# Supplementary material for: Effects of Fasting and Lifestyle Modification in Patients with Metabolic Syndrome: A Randomized Controlled Trial
Source: MDPI journal article supplement (doi:10.3390/jcm11164751), 2022-08-14
Supplement: s1 [file s1]

## Supplementary Material

Table S1: Type and number of adverse events in the two intervention groups.

| Type of adverse event                                                        | Total | F+LM | LM |
|------------------------------------------------------------------------------|-------|------|----|
| Tiredness                                                                    | 9     | 6    | 3  |
| Decreased physical capacity                                                  | 2     | 1    | 1  |
| Decreased memory                                                             | 1     | 1    | 0  |
| Depressive mood (mild) or sadness                                            | 2     | 2    | 0  |
| Panic, anxiety                                                               | 1     | 0    | 1  |
| Cranio-mandibular dysfunction                                                | 1     | 1    | 0  |
| Headache                                                                     | 5     | 4    | 1  |
| Tinnitus, increased                                                          | 2     | 1    | 1  |
| Vertigo                                                                      | 2     | 2    | 0  |
| Syncope                                                                      | 1     | 1    | 0  |
| Intermittent atrial fibrillation (with known paroxysmal atrial fibrillation) | 3     | 3    | 0  |
| Bronchitis                                                                   | 4     | 1    | 3  |
| Allergic symptoms                                                            | 2     | 1    | 1  |
| Common cold                                                                  | 6     | 3    | 3  |
| Fever after vaccination                                                      | 1     | 1    | 0  |
| Gout, episode                                                                | 1     | 1    | 0  |
| Eczema                                                                       | 2     | 1    | 1  |
| Thyroid dysfunction                                                          | 1     | 1    | 0  |
| Diabetes, newly diagnosed                                                    | 2     | 1    | 1  |
| Eructation                                                                   | 1     | 1    | 0  |
| Nausea                                                                       | 1     | 1    | 0  |
| Vomiting                                                                     | 4     | 4    | 0  |
| Gastrointestinal symptoms, unspecific                                        | 4     | 4    | 0  |
| Gastritis                                                                    | 1     | 1    | 0  |
| Diarrhea                                                                     | 1     | 1    | 0  |
| Incontinence                                                                 | 1     | 1    | 0  |
| Urinary retention                                                            | 1     | 1    | 0  |
| Muscular weakness                                                            | 1     | 1    | 0  |
| Back pain                                                                    | 6     | 4    | 2  |
| Leg pain                                                                     | 1     | 1    | 0  |
| Cramps in the leg                                                            | 2     | 2    | 0  |
| Fracture                                                                     | 3     | 2    | 1  |
| Anxiety                                                                      | 1     | 0    | 1  |

|                                              |     |    |    |
|----------------------------------------------|-----|----|----|
| Vertigo                                      | 1   | 0  | 1  |
| Hypertensive emergency                       | 1   | 0  | 1  |
| Obstructive sleep apnea                      | 1   | 0  | 1  |
| Pain associated with polymyalgia rheumatica  | 2   | 0  | 2  |
| Herpes zoster                                | 1   | 0  | 1  |
| Pruritus                                     | 1   | 0  | 1  |
| Dry eyes                                     | 1   | 0  | 1  |
| Gingivitis                                   | 1   | 0  | 1  |
| Tendinitis                                   | 2   | 1  | 1  |
| Carpal tunnel syndrome                       | 1   | 0  | 1  |
| Knee pain                                    | 3   | 0  | 3  |
| Lightheadedness                              | 7   | 5  | 2  |
| Thyroid nodules                              | 1   | 0  | 1  |
| Suspected coronary heart disease             | 1   | 0  | 1  |
| Rhinitis                                     | 1   | 0  | 1  |
| Bladder complaints                           | 1   | 0  | 1  |
| Knee effusion                                | 1   | 0  | 1  |
| Migraine                                     | 1   | 0  | 1  |
| Skull / brain trauma after car accident      | 1   | 0  | 1  |
| Syncopation                                  | 1   | 1  | 0  |
| Baker's cyst                                 | 1   | 1  | 0  |
| Flu                                          | 2   | 2  | 0  |
| Cervical spine syndrome with arm paresthesia | 1   | 0  | 1  |
| Hair loss                                    | 1   | 1  | 0  |
| Radiculopathy                                | 2   | 1  | 1  |
| Prostatitis                                  | 1   | 1  | 0  |
| Pain in heel spurs                           | 1   | 0  | 1  |
| Disc prolaps                                 | 1   | 0  | 1  |
| Hyperglycemia                                | 1   | 1  | 0  |
| Sclerodermia                                 | 1   | 1  | 0  |
| Osteoarthritis                               | 3   | 0  | 3  |
| Osteoarthritis aggravation                   | 1   | 1  | 0  |
| Paresthesia after vaccination                | 1   | 1  | 0  |
| Reflux                                       | 1   | 0  | 1  |
| Total                                        | 124 | 73 | 51 |

Abbreviations: F+LM, fasting and lifestyle modification; LM, lifestyle modification.
